# Supplementary material
Source: PubMed Central journal article supplement (PMC4666709)
Supplement: NIHMS718320-supplement-Supplementary_Data.pdf [file NIHMS718320-supplement-Supplementary_Data.pdf]

## SUPPORTING INFORMATION

**Residue-Based Preorganization of BH3-Derived  $\alpha/\beta$ -Peptides: Modulating Affinity, Selectivity and Proteolytic Susceptibility in  $\alpha$ -Helix Mimics**

Kimberly J. Peterson-Kaufman<sup>†</sup>, Holly S. Haase<sup>†</sup>, Melissa D. Boersma<sup>†</sup>,

Erinna F. Lee<sup>§</sup>, W. Douglas Fairlie<sup>§,\*</sup> and Samuel H. Gellman<sup>†,\*</sup>

**NMR data.** Shown below are <sup>1</sup>H NMR and <sup>13</sup>C NMR data for protected  $\beta$ -amino acid **1**.

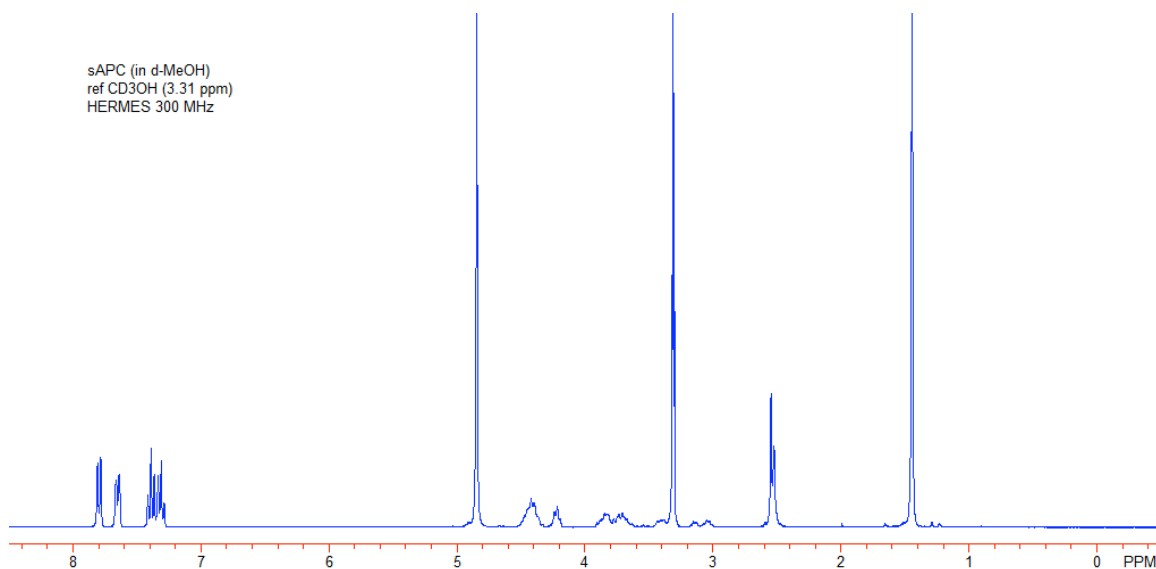

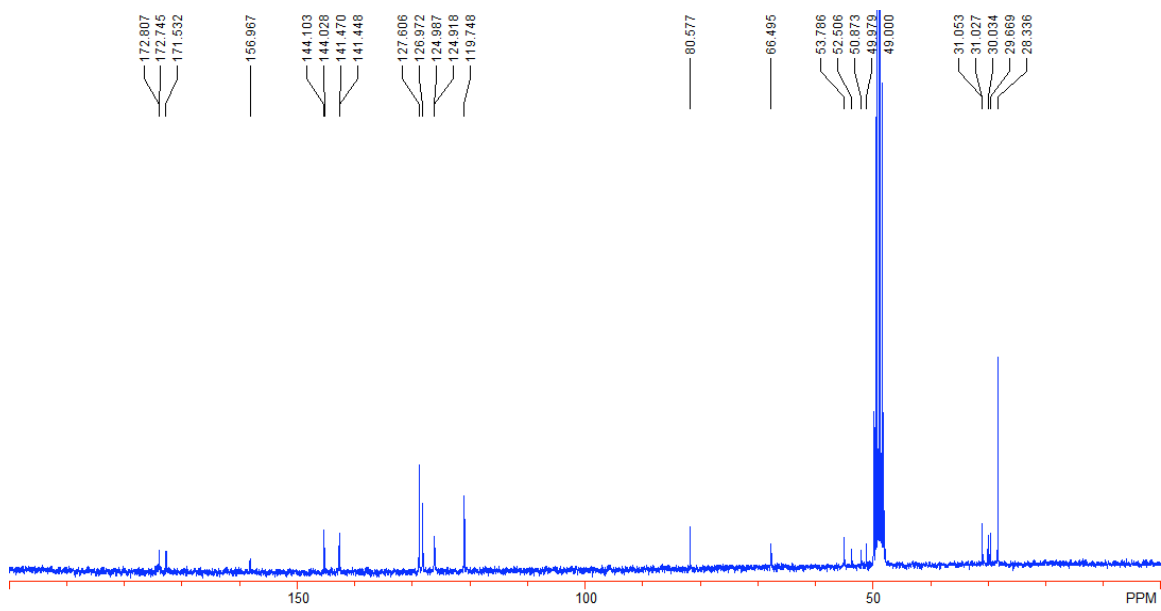

**Representative competition fluorescence polarization assay data.** These studies were conducted as described in the main text.

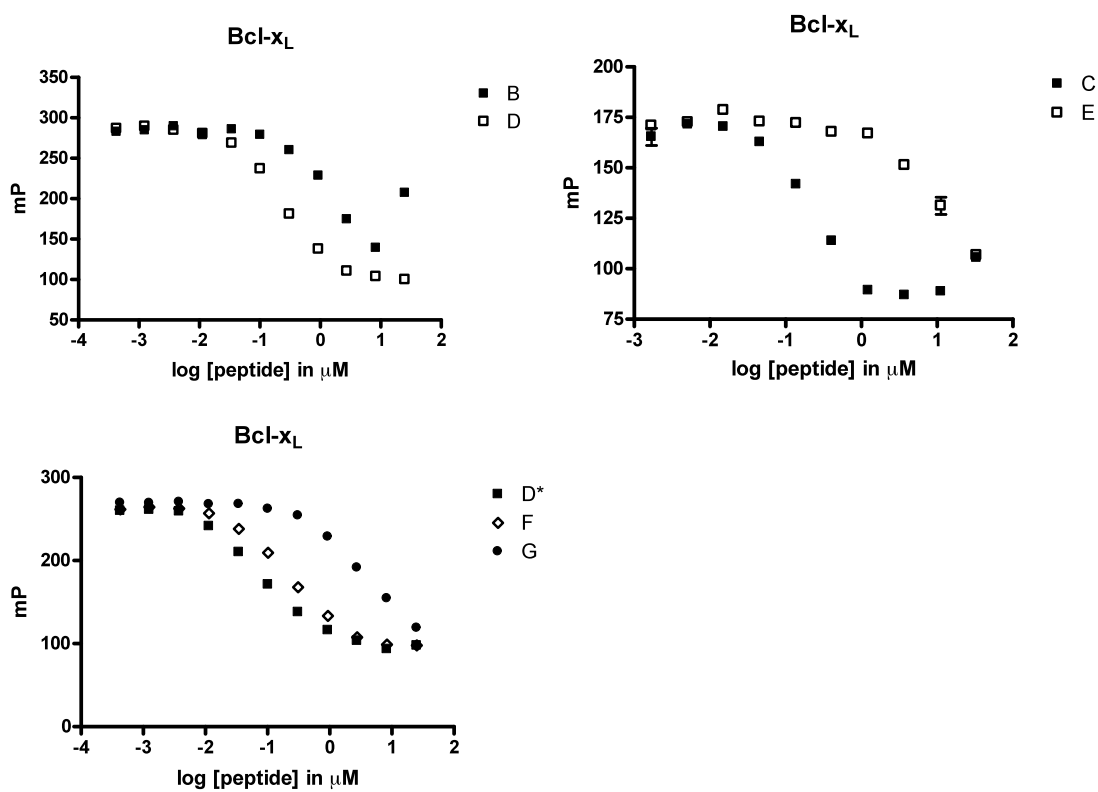

**Figure S1.** Representative competition fluorescence polarization (FP) data for  $\alpha/\beta$ -peptides B, C, D, D\*, E, F, and G binding to Bcl-x<sub>L</sub>.

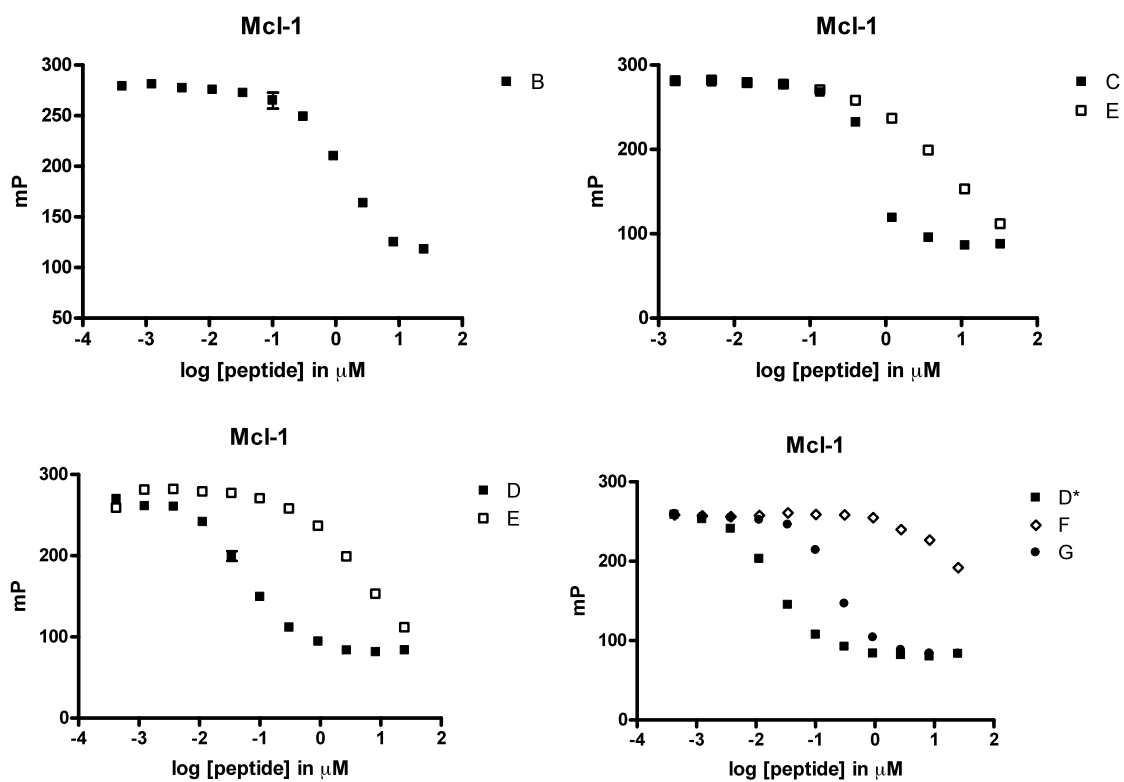

**Figure S2.** Representative competition fluorescence polarization (FP) data for  $\alpha/\beta$ -peptides **B**, **C**, **D**, **D\***, **E**, **F**, and **G** binding to Mcl-1.

**Peptide Characterization.** Following lyophilization, peptide purity was assessed through HPLC and MALDI-TOF analyses. Analytical HPLC was run on a C4 or C18 analytical column using a 10-60% MeCN + 0.1% TFA (B solvent) in water + 0.1% TFA (A solvent) over 50 minutes. The traces shown are based on UV absorbance at 220 nm (**Figure S3**). All peptides used in this study were  $\geq 95\%$  pure. Peptide identity was monitored by MALDI-TOF mass spectrometry (**Table S1**).

**A**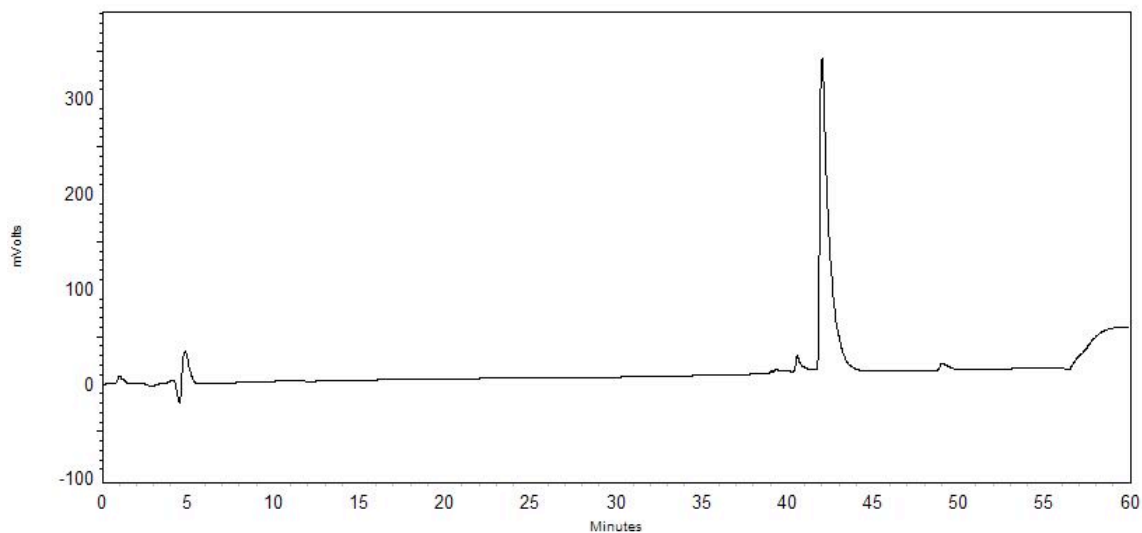**B**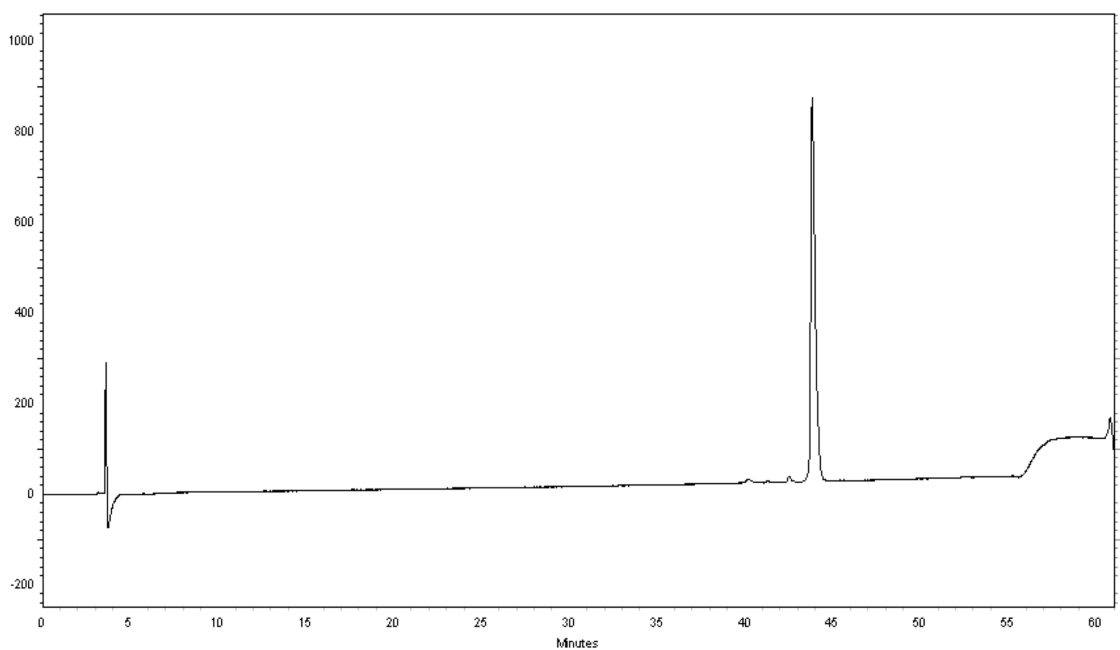

**C**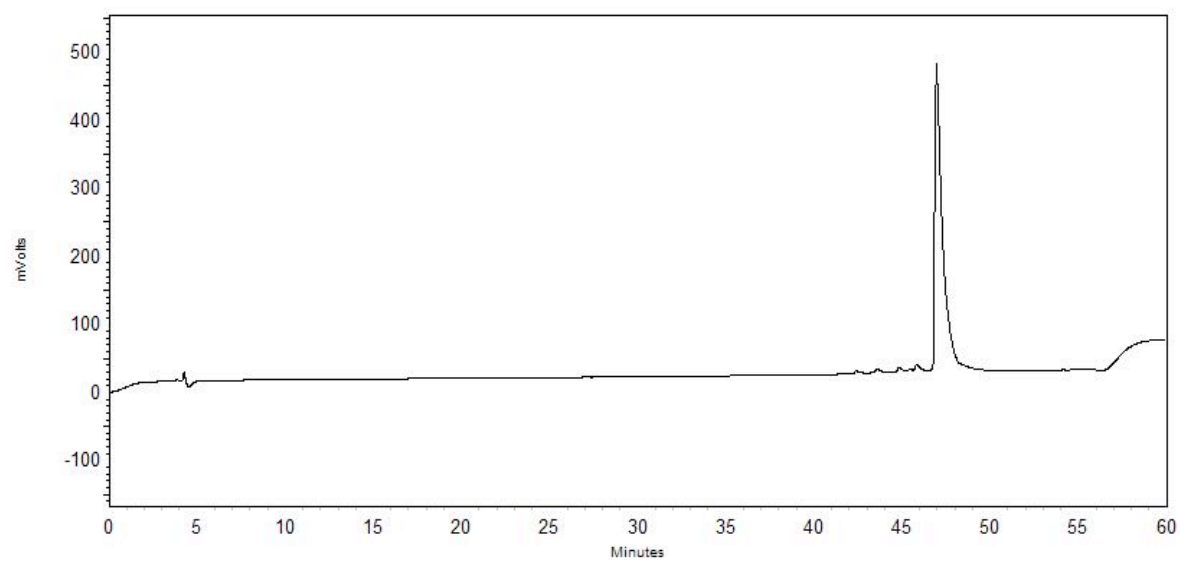**D**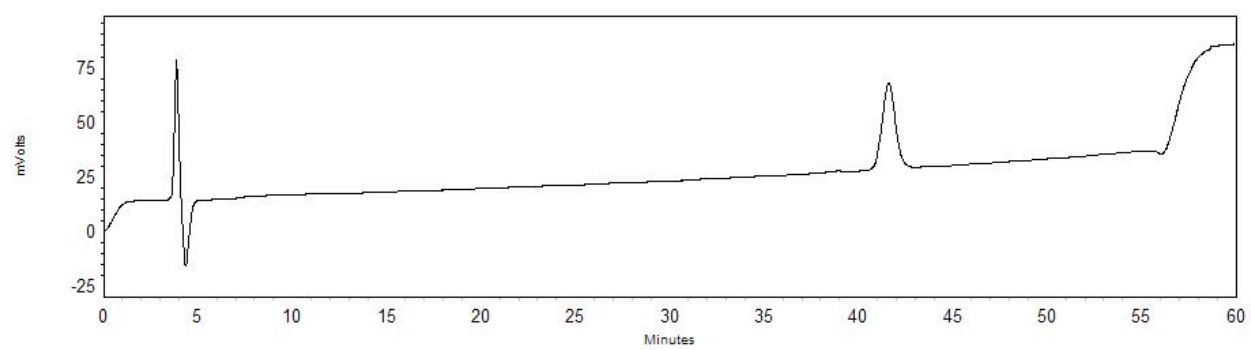**D\***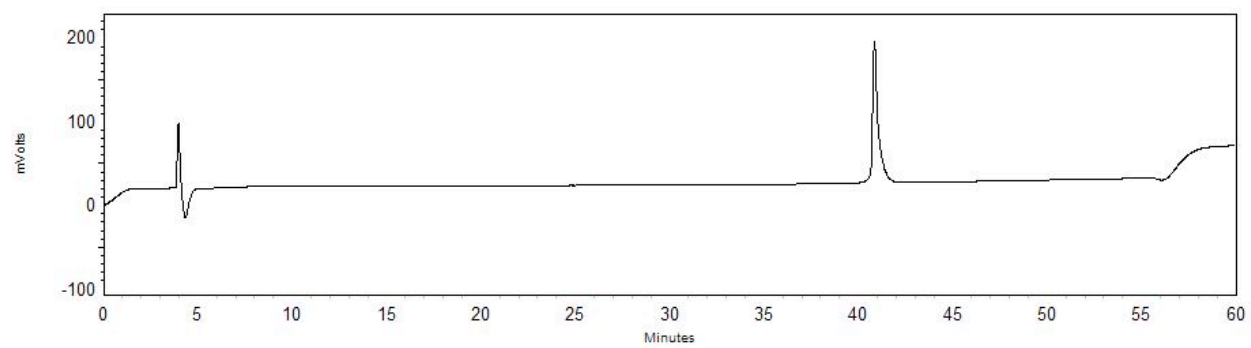

**Figure S3.** Analytical HPLC Traces for  $\alpha$ -peptide **A** and  $\alpha/\beta$ -peptides **B**, **C**, **D**, **D\***, **E**, **F**, and **G**.

|           | [M+H] <sup>+</sup><br>expected | [M+H] <sup>+</sup><br>observed |
|-----------|--------------------------------|--------------------------------|
| <b>A</b>  | 2298.1                         | 2297.8                         |
| <b>B</b>  | 2368.2                         | 2367.5                         |
| <b>C</b>  | 2368.2                         | 2368.0                         |
| <b>D</b>  | 2385.2                         | 2384.9                         |
| <b>D*</b> | 2351.2                         | 2351.1                         |
| <b>E</b>  | 2216.2                         | 2215.6                         |
| <b>F</b>  | 2266.2                         | 2266.3                         |
| <b>G</b>  | 2232.2                         | 2232.4                         |

**Table S1.** Expected and observed masses of  $\alpha$ -peptide **A** and  $\alpha/\beta$ -peptides **B**, **C**, **D**, **D\***, **E**, **F**, and **G** by MALDI-TOF-MS.

**Proteolysis.** These studies were carried out as described in the main text.

A)

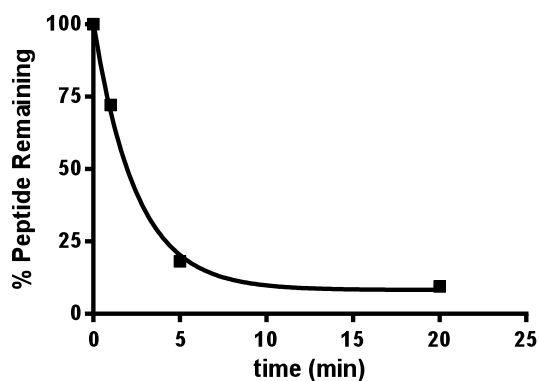

B)

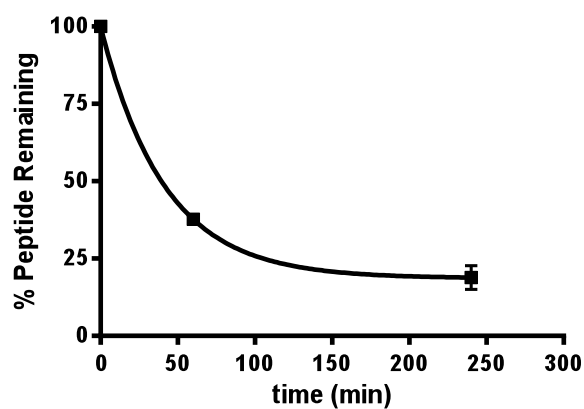

C)

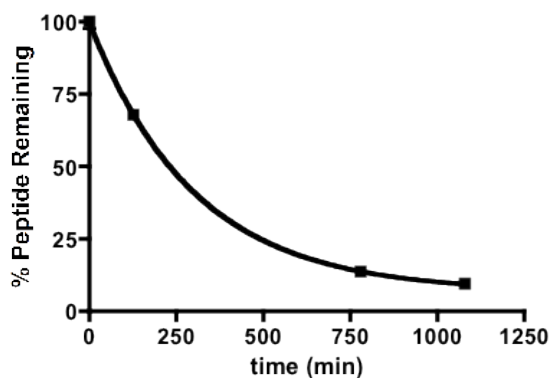

**Figure S4.** Curves resulting from proteolysis of 50  $\mu\text{M}$  solutions of  $\alpha$ -peptide **A** (A) or  $\alpha/\beta$ -peptide **B** (B) or **D** (C), in the presence of 10 mg/mL proteinase K as a function of time. Reactions were run in TBS buffer, pH 7.5, with 5% DMSO, and quenched with 1% TFA in 50:50 acetonitrile:H<sub>2</sub>O. Curves result from fitting the data to an exponential decay model in GraphPad Prism. Note the substantial differences in x-axes among the graphs.
